# Supplementary material for: Low Incidence of Avian Predation on the Brown Marmorated Stink Bug, Halyomorpha halys (Hemiptera: Pentatomidae), in Southeastern Orchard Systems
Source: MDPI journal article supplement (doi:10.3390/insects14070595), 2023-07-01
Supplement: s1 [file s1]

Supplemental Materials Table 1: Positive incidence of *H. halys* consumption by birds. We detected consumption of the brown marmorated stink bug (*H. halys*) in four out of 257 avian fecal samples. We considered a positive incidence of predation on *H. halys* if RFUs >0.075. For each bird species the USGS aluminum band prefix and band code, RFU values, and concentration (ng/uL) are shown. RFU values and concentration were visualized on a Qiagen Qiaxcel Advanced System.

| Sample            | Band prefix | Band code | RFU   | Concentration (ng/uL) |
|-------------------|-------------|-----------|-------|-----------------------|
| Tufted titmouse   | 2941        | 24633     | 0.17  | 0.25                  |
| Carolina wren     | 2941        | 24656     | 0.157 | 0.24                  |
| Carolina wren     | 2941        | 24664     | 0.077 | 0.12                  |
| Northern cardinal | 2841        | 26539     | 0.151 | 0.22                  |
| Positive control  | -           | -         | 0.76  | 1.9                   |
| Positive control  | -           | -         | 1.564 | 2.43                  |
